# Supplementary material
Source: PubMed Central journal article supplement (PMC4130166)
Supplement: NIHMS605046-supplement-Supp_FigureS1-S7.pdf [file NIHMS605046-supplement-Supp_FigureS1-S7.pdf]

**A**

SignalP-4.1 prediction (euk networks): SC65

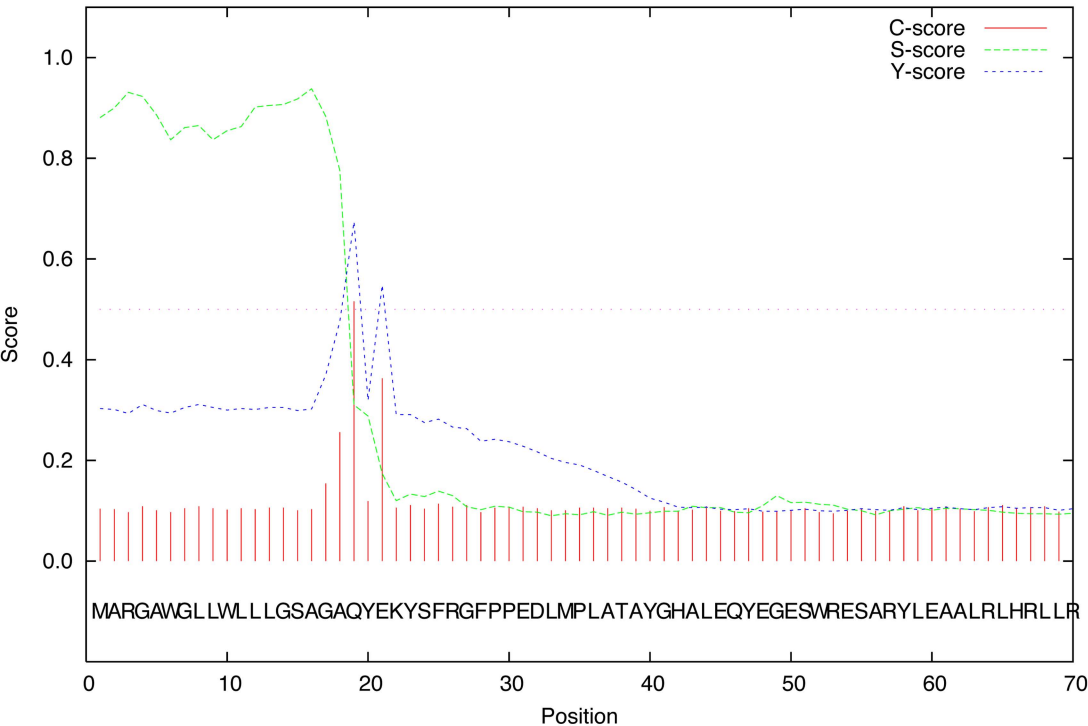

C-score (raw cleavage site score). The highest value indicate the site of cleavage of the predicted signal peptide. S-score (signal peptide score). Trained to distinguish positions within the signal peptide from position within the mature protein and from proteins lacking a signal peptide. Y-score (combined cleavage score). Trained to distinguish between C-score peakes which one corresponds to the point where the S-score slope is steep.

Name=SC65 SP='YES' Cleavage site between pos. 18 and 19: AGA-QY.  
Discrimination score (D)=0.786 D-cutoff=0.450. Networks=SignalP-noTM

**B**

targetp v1.1 prediction results  
Number of query sequences: 1  
Cleavage site predictions included.  
Using NON-PLANT networks.

| Name     | Len | mTP   | SP    | other | Loc | RC | TPlen |
|----------|-----|-------|-------|-------|-----|----|-------|
| Sequence | 443 | 0.043 | 0.953 | 0.054 | S   | 1  | 18    |
| cutoff   |     | 0.000 | 0.000 | 0.000 |     |    |       |

Len, Sequence length; mitochondrial targeting peptide, mTP; secretory pathway (SP); location (Loc); reliability class (RC), range 1-5, 1 represents the strongest prediction, predicted presequence length, TPlen.

**Suppl. Figure 1**

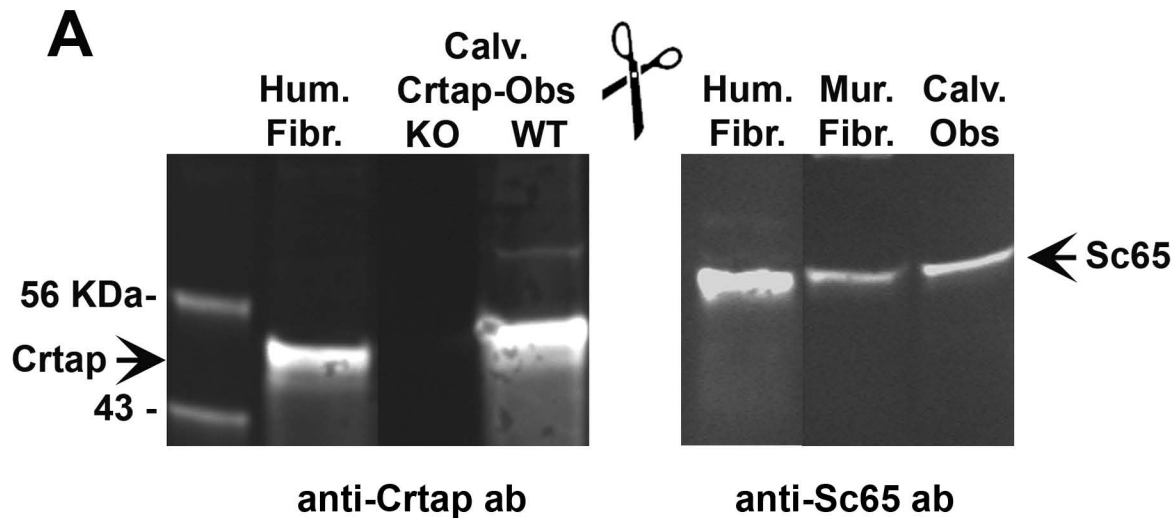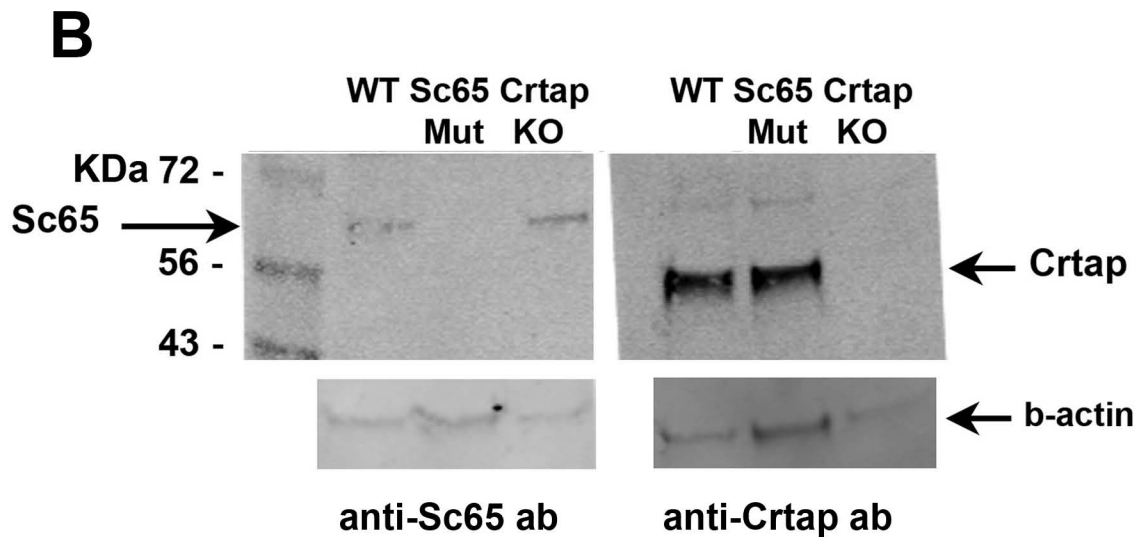

Suppl. Figure 2

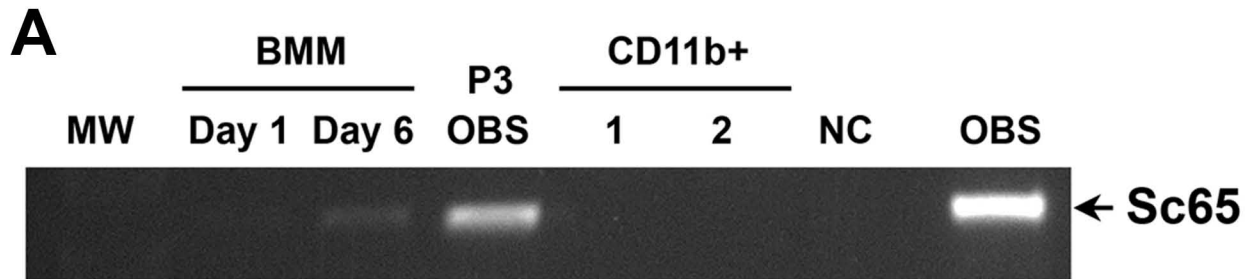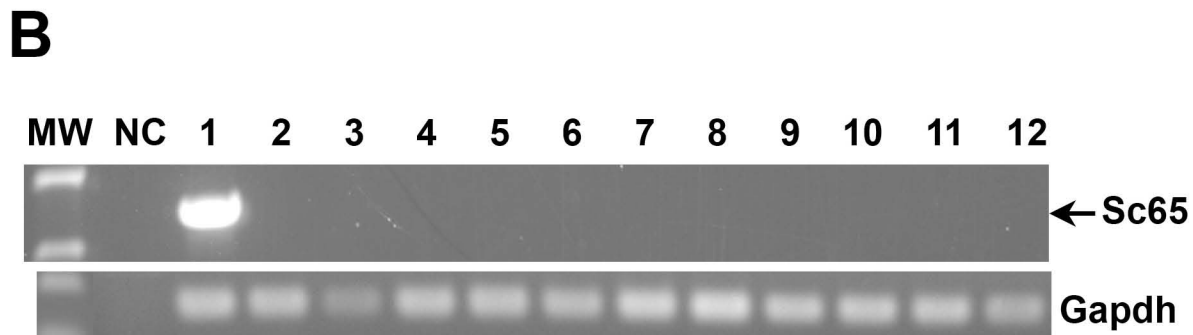

Suppl. Figure 3

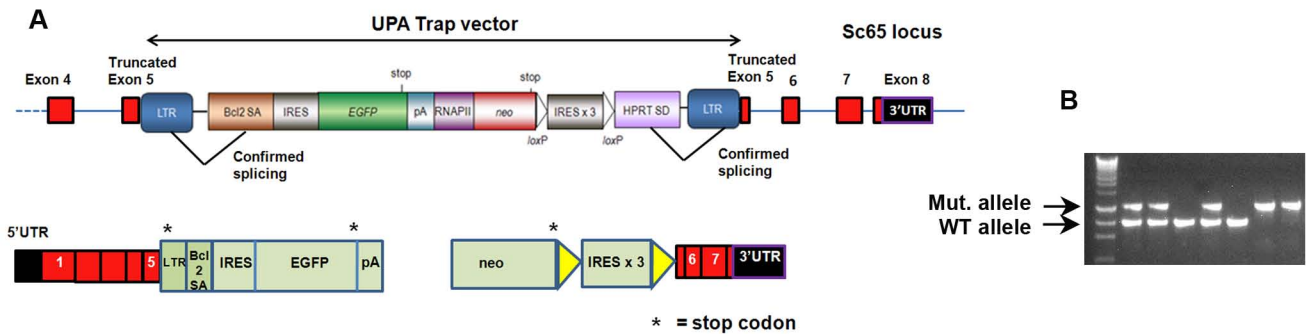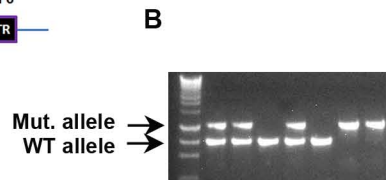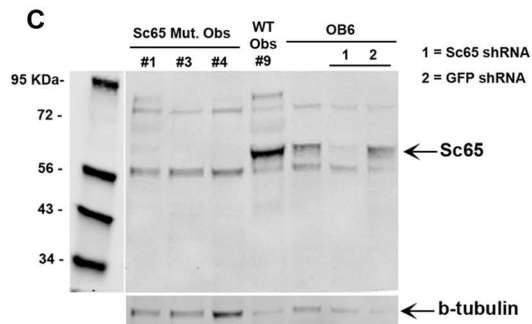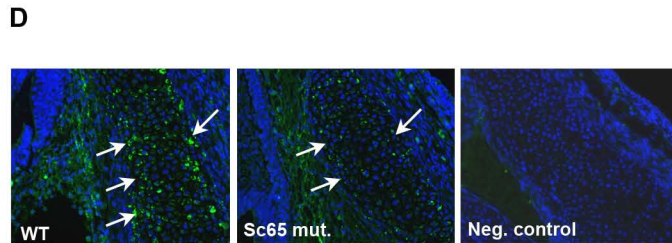

Suppl. Fig.4

| MALES                           | 4 week-old (n=4) |          |         | 10 week-old (n=6) |          |              | 24 week-old (n=7) |          |              |
|---------------------------------|------------------|----------|---------|-------------------|----------|--------------|-------------------|----------|--------------|
|                                 | WT               | Sc65 Mut | p value | WT                | Sc65 Mut | p value      | WT                | Sc65 Mut | p value      |
| BV/TV (%)                       | 14.98            | 14.75    | 0.94    | 22.87             | 16.25    | <b>0.004</b> | 22.63             | 15.37    | <b>0.005</b> |
| Conn.Dens. (1/mm <sup>3</sup> ) | 178.16           | 191.30   | 0.83    | 228.39            | 163.39   | <b>0.009</b> | 99.86             | 50.25    | <b>0.001</b> |
| SMI                             | 2.49             | 2.59     | 0.62    | 1.90              | 2.32     | 0.052        | 1.51              | 2.11     | <b>0.006</b> |
| Tb.N. (1/mm)                    | 4.99             | 5.12     | 0.92    | 5.97              | 5.14     | <b>0.002</b> | 4.79              | 3.675    | <b>0.003</b> |
| Tb.Th. (mm)                     | 0.041            | 0.04     | 0.746   | 0.053             | 0.048    | 0.054        | 0.06              | 0.06     | 0.757        |
| Tb.Sp. (mm)                     | 0.206            | 0.207    | 0.985   | 0.156             | 0.181    | <b>0.002</b> | 0.199             | 0.275    | <b>0.008</b> |

| FEMALES                         | 10 week-old (n=5) |          |         | 24 week-old (n=7) |          |              |
|---------------------------------|-------------------|----------|---------|-------------------|----------|--------------|
|                                 | WT                | Sc65 Mut | p value | WT                | Sc65 Mut | p value      |
| BV/TV (%)                       | 18.1              | 15.52    | 0.51    | 14.34             | 8.84     | <b>0.014</b> |
| Conn.Dens. (1/mm <sup>3</sup> ) | 163.27            | 130.11   | 0.23    | 62.36             | 45.07    | 0.166        |
| SMI                             | 1.99              | 2.23     | 0.53    | 2.35              | 2.53     | 0.41         |
| Tb.N. (1/mm)                    | 4.89              | 4.27     | 0.12    | 3.53              | 2.81     | <b>0.009</b> |
| Tb.Th. (mm)                     | 0.05              | 0.05     | 1       | 0.06              | 0.06     | 0.927        |
| Tb.Sp. (mm)                     | 0.205             | 0.236    | 0.15    | 0.289             | 0.367    | <b>0.009</b> |

**WT**

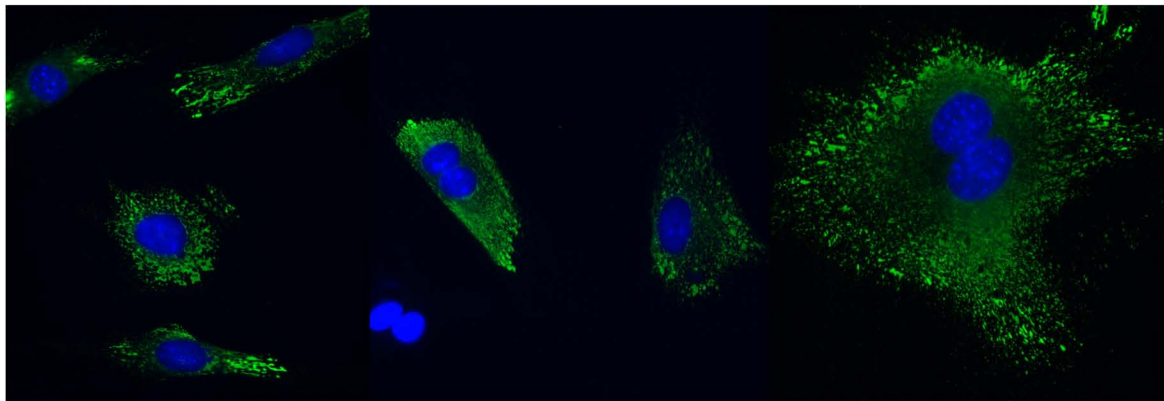

**Sc65  
Mut**

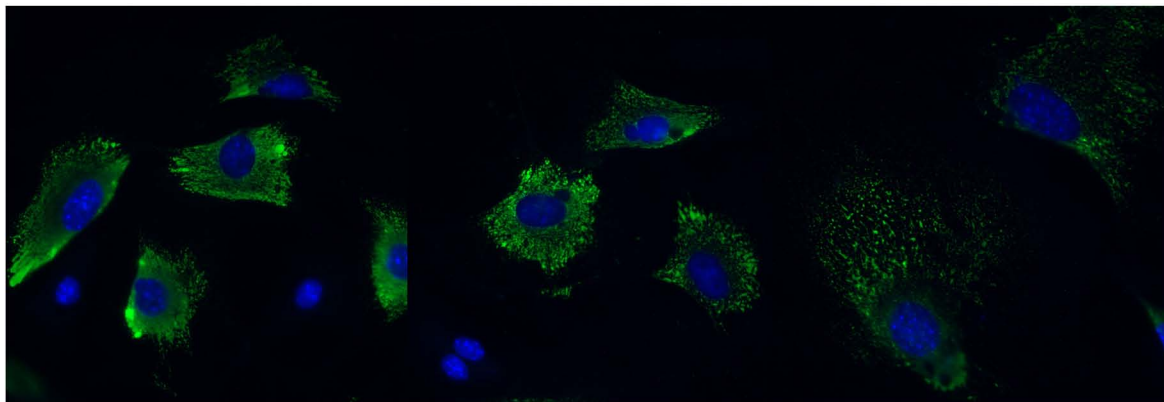

**Suppl. Figure 6**

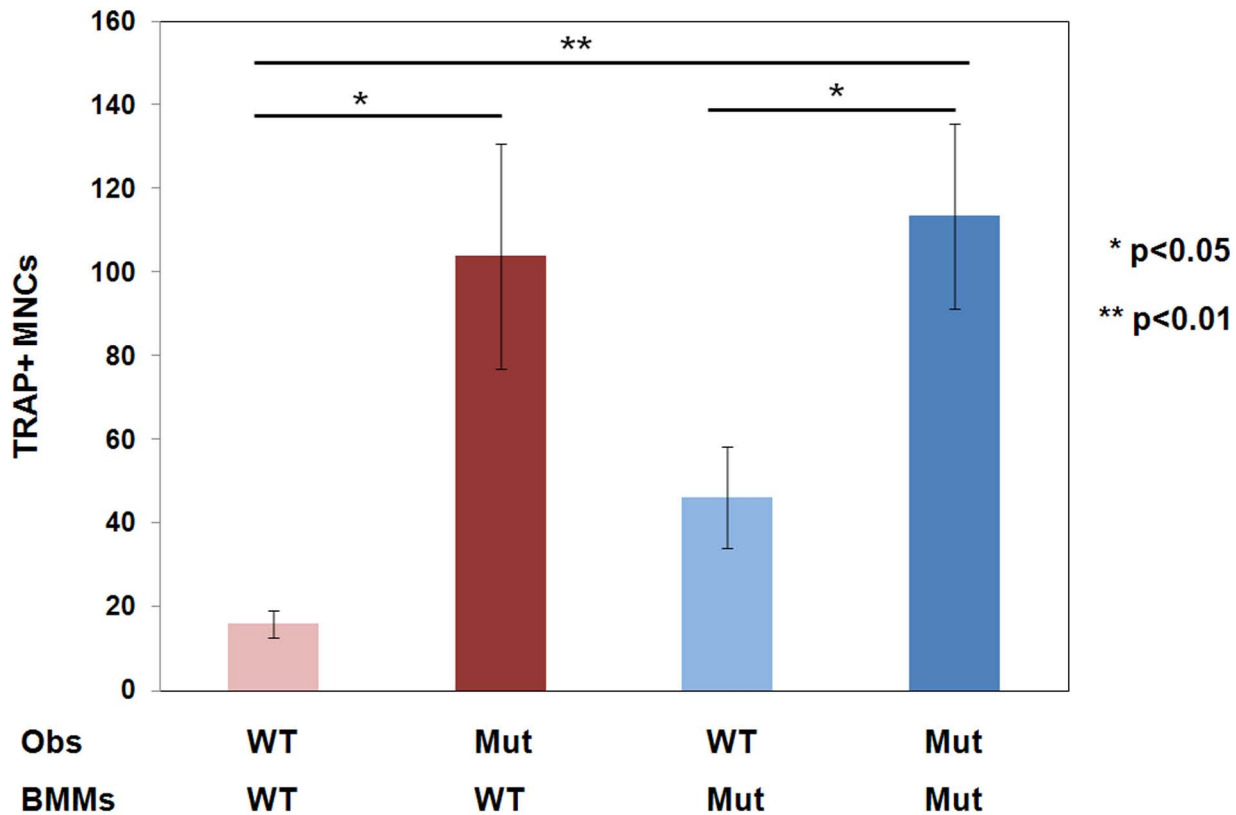

Suppl. Fig.7
